# Supplementary material
Source: PubMed Central journal article supplement (PMC3707564)
Supplement: supp_pp.113.219162_219162supp.pdf [file supp_pp.113.219162_219162supp.pdf]

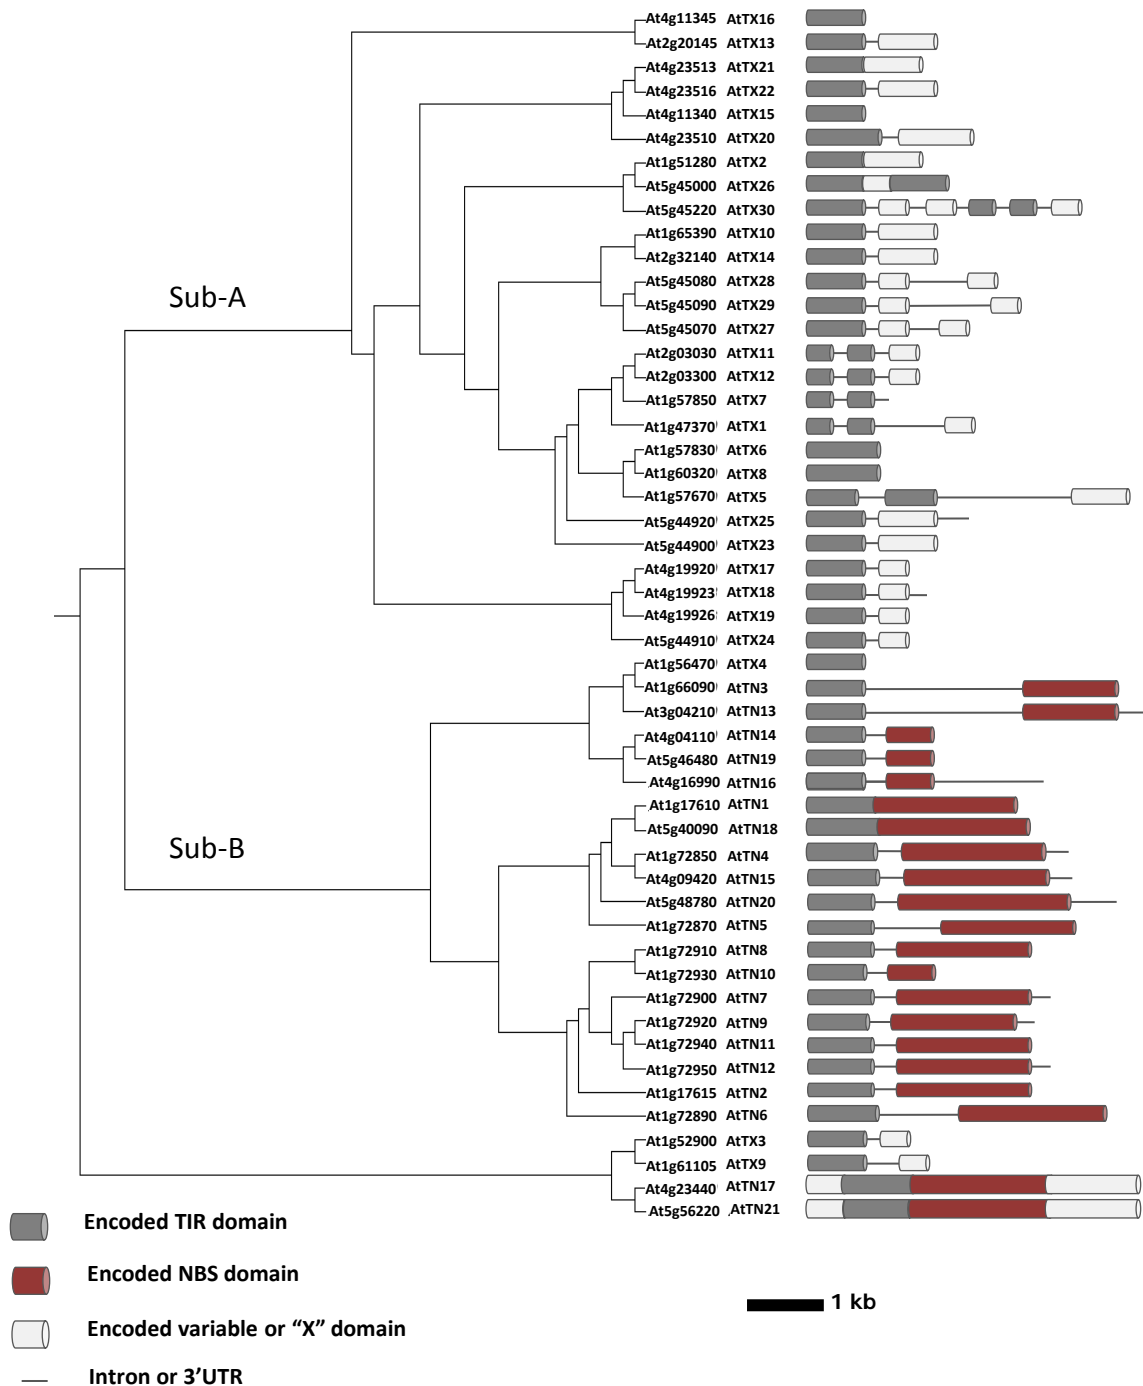

### Supplemental Figure 1. Phylogeny and conservation of TX and TN protein domains.

Phylogenetic tree of TN and TX protein domains encoded in the *Arabidopsis Col-0* genome. The tree was generated using ClustalW. Domain structure is based on annotated structures published by Meyers et al. (2002). The grey boxes represent the TIR domain; red boxes represent the NBS sub-domain; white boxes indicate a variable "X" domain; a thin single line indicates an intron.

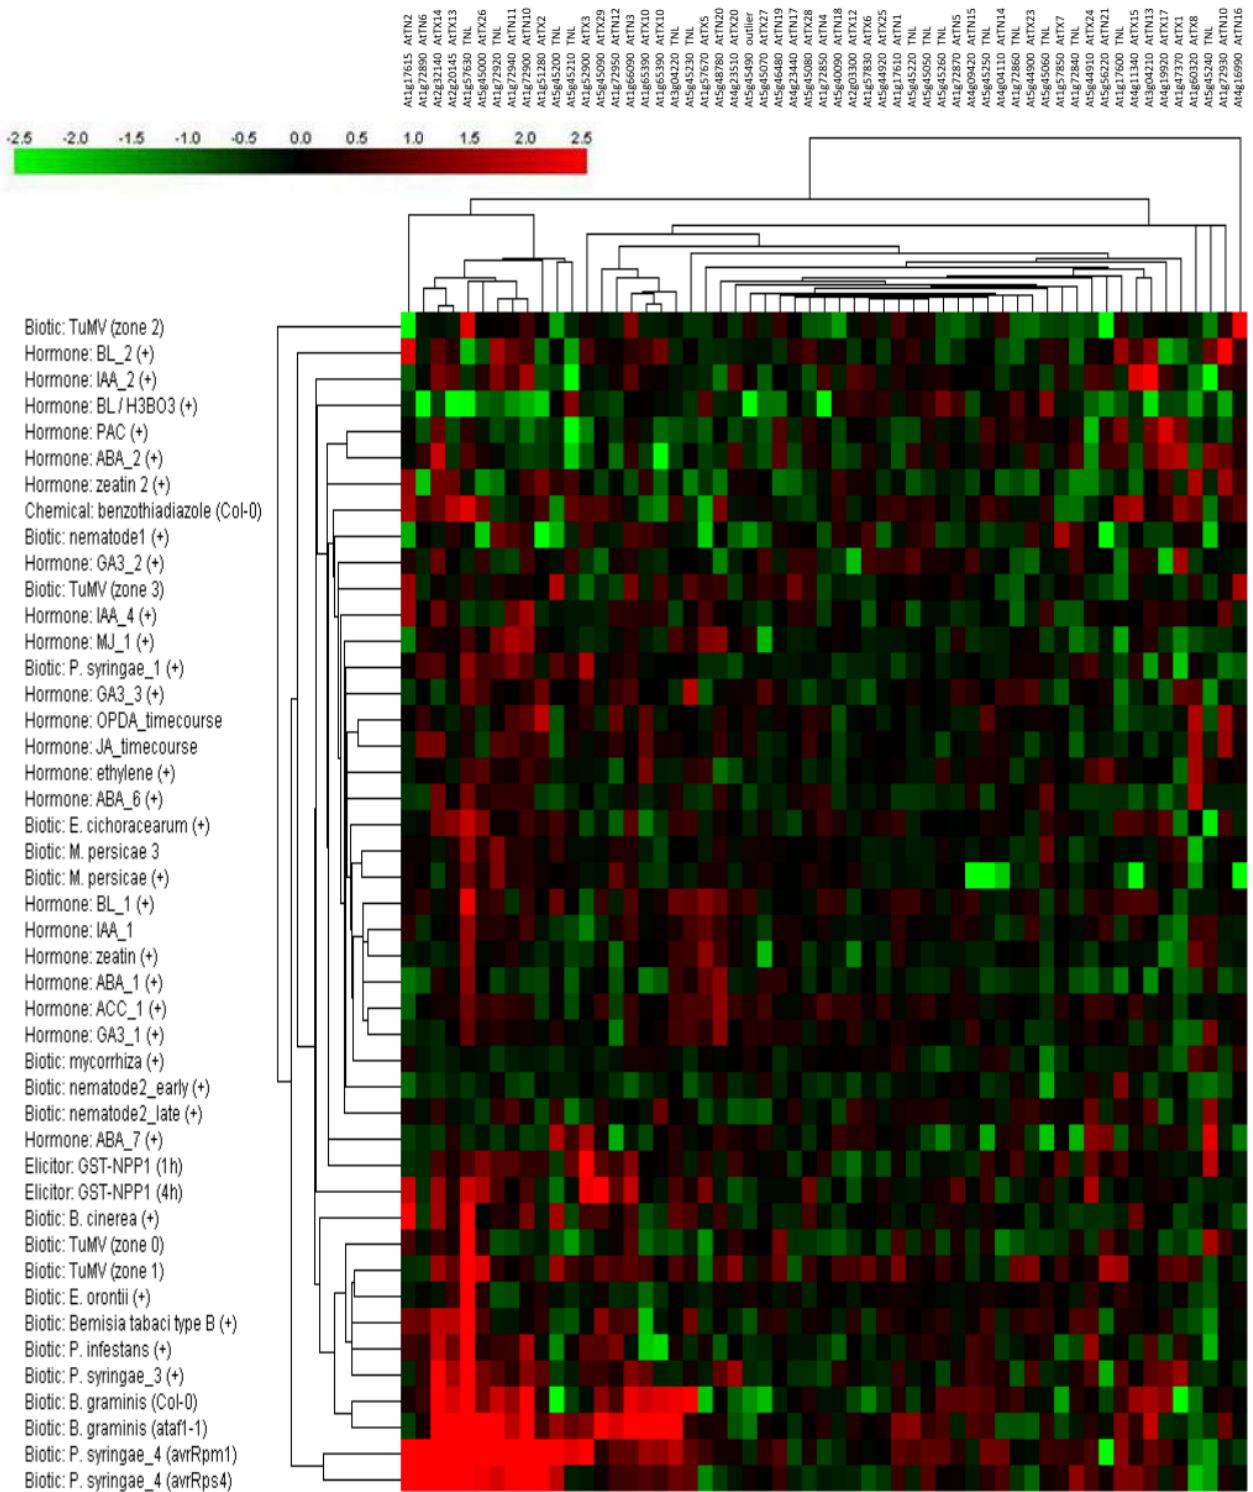

**Supplemental Figure 2. Expression levels of *TN* and *TX* genes vary under biotic stresses.**

*TN* and *TX* transcript levels were assessed using microarray data available from Genevestigator; we searched a range of biotic stress conditions in this database. Red colors indicate genes that are up-regulated relative to the control for a given treatment; green colors indicate genes that were down-regulated relative to the control.

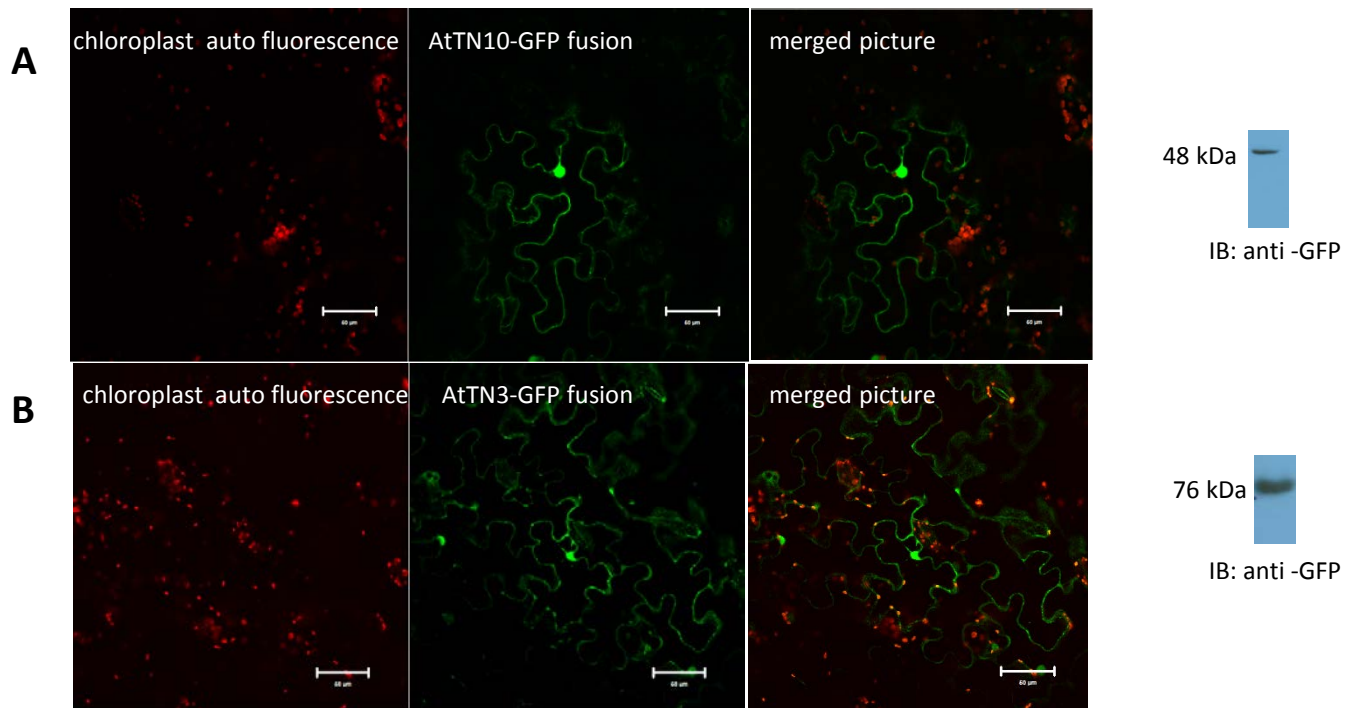

**Supplemental Figure 3. Western blots of the TN proteins AtTN10 and AtTN3 using anti-GFP antibodies confirm protein expression and localization in the nucleus and cytoplasm.**

A) AtTN10 GFP fusion protein transiently overexpressed in *N. benthamiana* leaves displayed nuclear and cytoplasmic localization. The western blot shows a 48 kDa protein corresponding to the AtTN10 GFP fusion protein. B) AtTN3 GFP fusion protein transiently overexpressed in *N. benthamiana* leaves displayed nuclear and cytoplasmic localization. The western blot shows a 76 kDa protein corresponding to the AtTN10 GFP fusion protein. The confocal images were obtained at 20  $\mu\text{m}$  magnification..



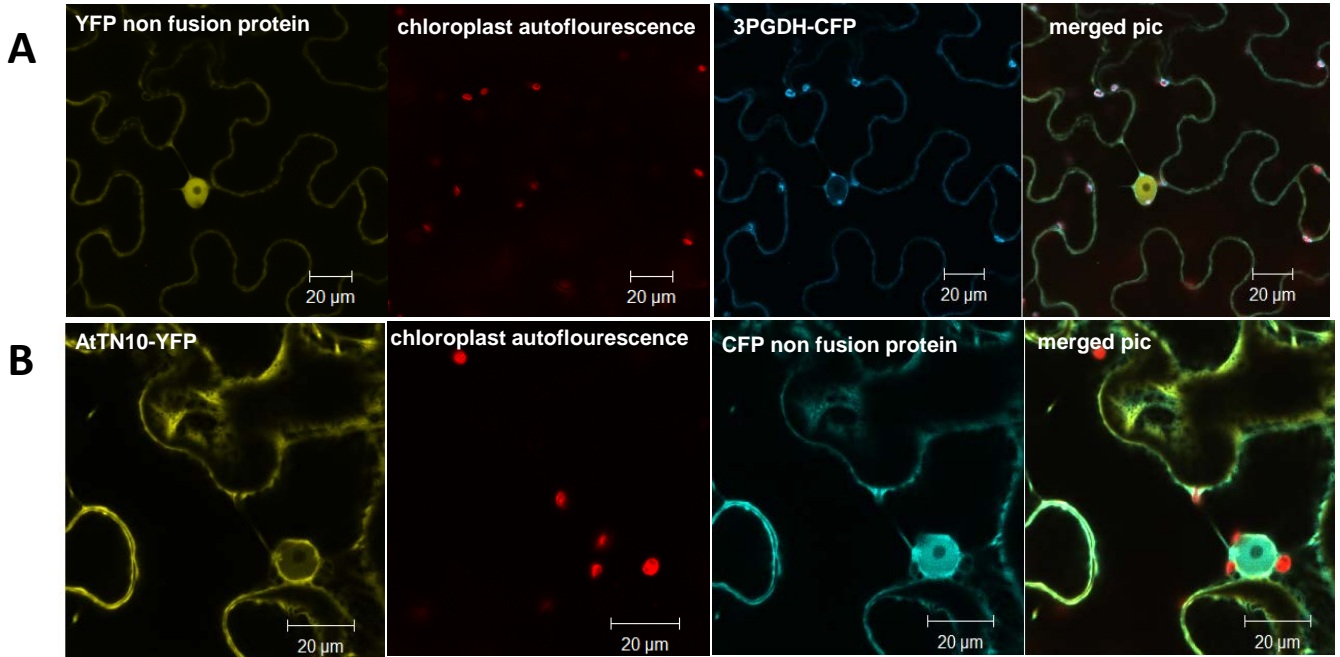

**Supplemental Figure 5. Co-localization of YFP with 3PGDH-CFP or AtTN10-YFP with CFP resulted in cytoplasmic localization.**

A) Non-fusion YFP protein co expressed with 3PGDH-CFP protein. B) AtTN10-YFP fusion protein co expressed with CFP non fusion protein in *N. benthamiana* leaves. The confocal images were obtained at 20 µm magnification.

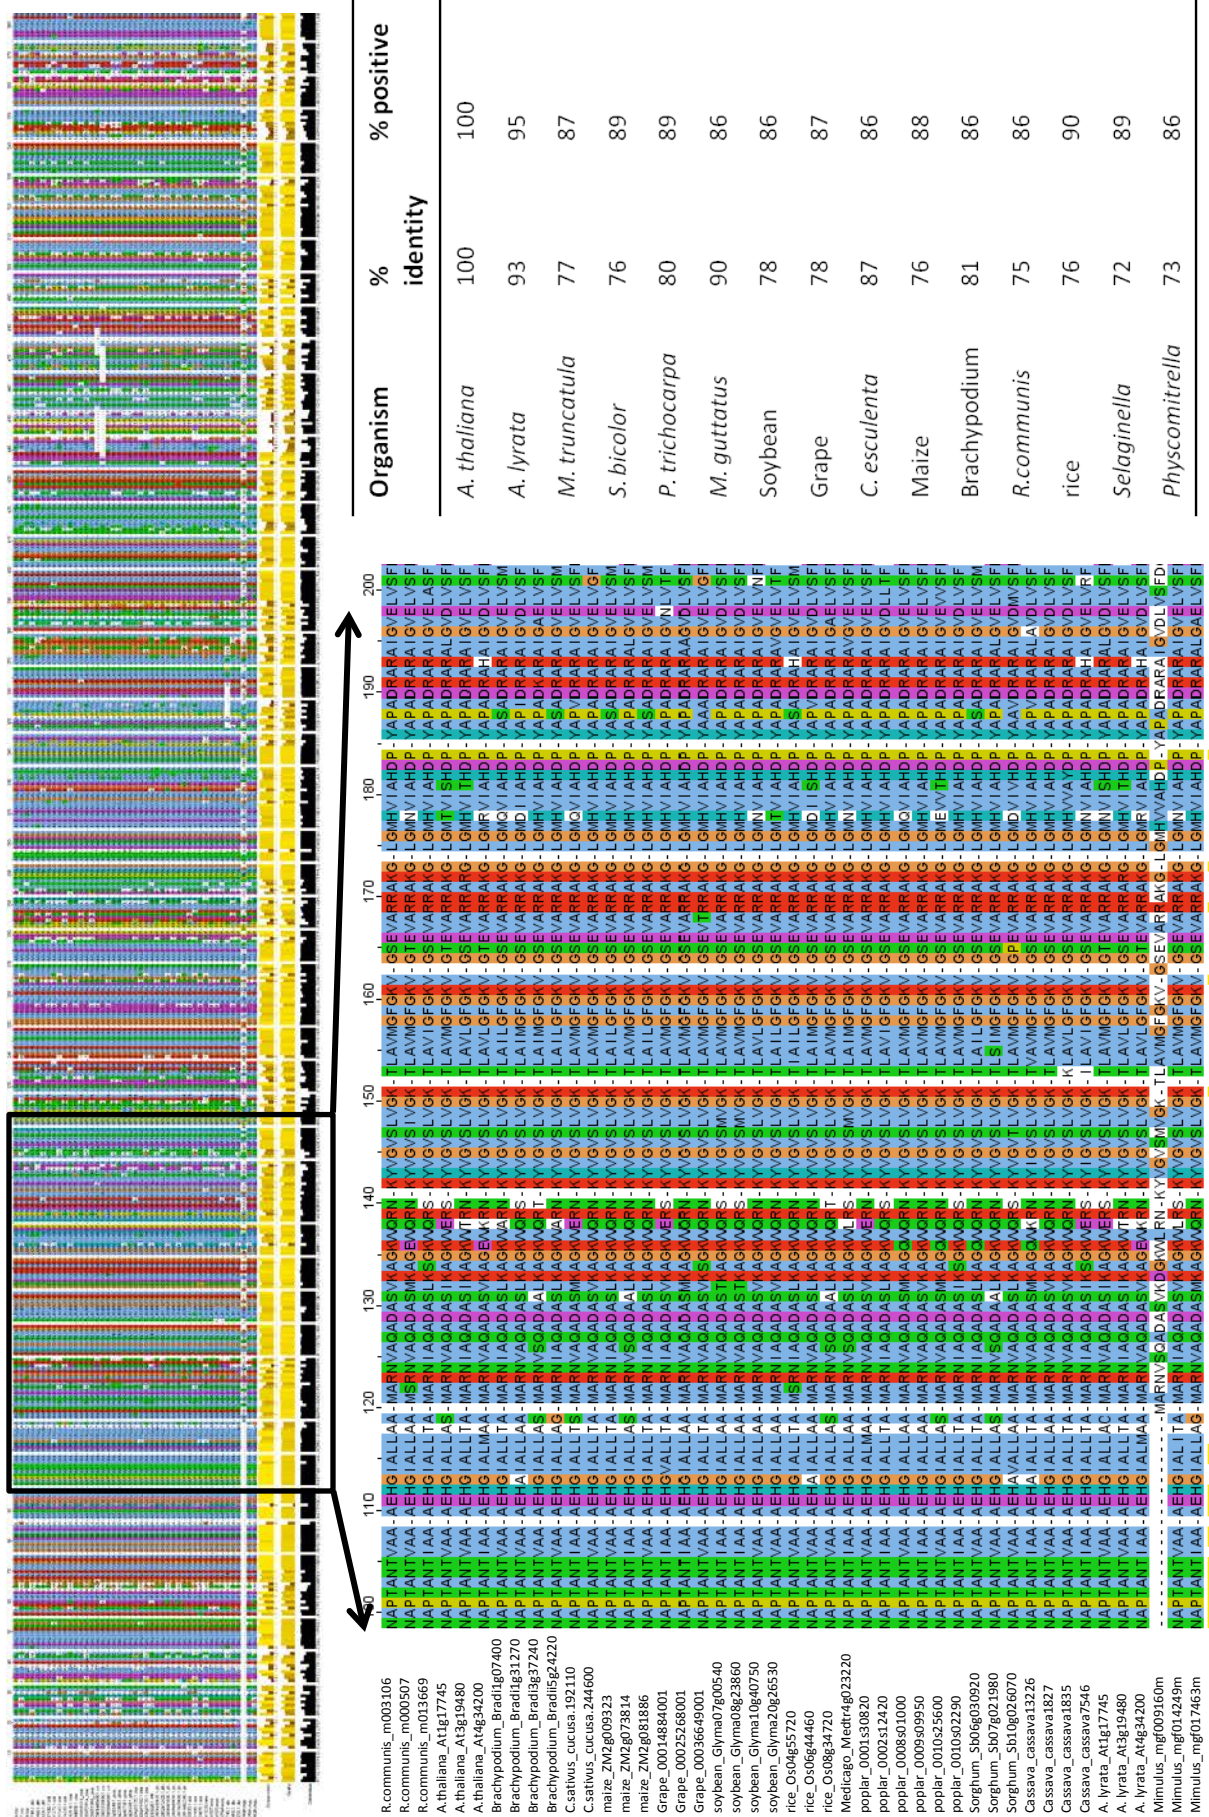

**Supplemental Figure 6. Arabidopsis 3PGDH protein At1g17745 is well conserved among other plant genomes.**

The Arabidopsis 3PGDH protein was compared against the Phytosome set of plant proteins (<http://www.phytosome.net>). Sequence alignment of Arabidopsis 3PGDH protein with homologous sequences was performed using Clustal. Annotation: Brachy = Brachypodium sequence; maize = maize sequence; rice = rice sequence; grape = grape sequence; sorghum = sorghum sequence. Blast analysis produced a score of zero for all the organisms.

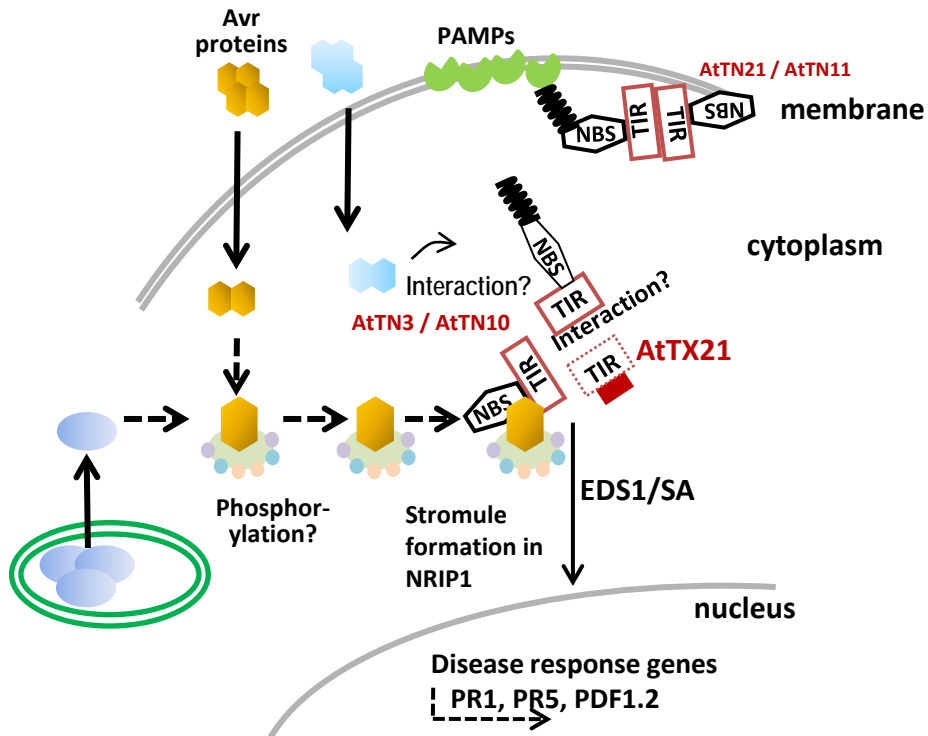

**Supplemental Figure 7. Model for the function of Arabidopsis TN and TX proteins.** Plant TX and TN proteins may function as accessory proteins in the detection of pathogen effector proteins or their activities, or may function in signal transduction during defense responses. Based on genomic pairs of *TN* and *TNL* genes in the Arabidopsis genome and encoded “fusion proteins”, we believe that the TN proteins likely function together with *TNL* proteins.

**Supplemental Table 1. Primers designed for the amplification of transcript abundance through the use of real time PCR.**

| <b>No.</b> | <b>Primer Name</b> | <b>Sequence (5'-...- 3')</b> |
|------------|--------------------|------------------------------|
| 1          | AtTN2 for          | GAGACAAGCTCTGACCAATTTG       |
| 2          | AtTN2 rev          | TCACTTGGTGGTGTACCGAG         |
| 3          | AtTX10 for         | CACCTCGCTGCCGCTTTTGA         |
| 4          | AtTX10 rev         | CACCATGGGGACTCCGCATA         |
| 5          | AtTN10 for         | GCGTGGAACCGAATCATGTGAG       |
| 6          | AtTN10 rev         | TTGTCCACCAGCTTCGAGTCATC      |
| 7          | AtTN11 for         | GAGAAAGTTGCTTCGTGGAGACG      |
| 8          | AtTN11 rev         | CTTGTCAGCAATTTGTCACC         |
| 9          | AtTN21 for         | CCTGCTCCTCCAAGGATCTCTT       |
| 10         | AtTN21 rev         | GCGATTCCCTGAAGCTCAAG         |
| 11         | AtTN3 for          | GACCTGTGTGGGCAACATAACCG      |
| 12         | AtTN3 rev          | CCGAGATCCCAACGATCTTAAC       |
| 13         | AtTX21 for         | GGAGATCAGCGAAATCAATGT        |
| 14         | AtTX21 rev         | TCTTGATCTCAACTAGCTCGTCTAA    |
| 15         | AtTN13 for         | GGAGACATGCTTTGGAGGAAGTCG     |
| 16         | AtTN13 rev         | GAAATCACTTGACGGCGTTGAGA      |
| 17         | PDF1.2 for         | TTTGCTGCTTTCGACGCAC          |
| 18         | PDF1.2 rev         | CGCAAACCCCTGACCATG           |
| 19         | EDS1 for           | CGAAGGGGACATAGATTGGA         |
| 20         | EDS1 rev           | ATGTACGGCCCTGTGTCTTC         |



**Supplemental Table 2. Primers designed for the amplification of *TX* and *TN* transcripts for cloning and generation of pENTRY gateway vectors.**

| No. | Primer Name | Sequence (5'-...- 3')                                          |
|-----|-------------|----------------------------------------------------------------|
| 1   | AtTN10 for  | GGGGACAAGTTTGTACAAAAAAGCAGGCTTCATGTCTTCTCATACTGCAACTAAGTATGATG |
| 2   | AtTN11 for  | GGGGACAAGTTTGTACAAAAAAGCAGGCTTCATGACTTCTCCTACTGCGACTAAGTATG    |
| 3   | AtTN13 for  | GGGGACAAGTTTGTACAAAAAAGCAGGCTTCATGGTTTATAGAAAATTCAGGTTACACC    |
| 4   | AtTN21 for  | GGGGACAAGTTTGTACAAAAAAGCAGGCTTCATGAAGGGAATAGAAGAAGAAGCAAG      |
| 5   | AtTX21 for  | GGGGACAAGTTTGTACAAAAAAGCAGGCTTCATGACGAACTTCTCAGTCGCGG          |
| 6   | AtTN3 for   | GGGGACAAGTTTGTACAAAAAAGCAGGCTTCATGGCTGCATCTACTTCTTCTTCTTC      |
| 7   | AtTN2 for   | GGGGACAAGTTTGTACAAAAAAGCAGGCTTCATGTCTACTTCTTATTCTTTTTTGTGGC    |
| 8   | AtTN2 rev   | GGGGACCACTTTGTACAAGAAAGCTGGGTCTAGAAAGATTTCAGTCCCGGATATAGGTG    |
| 9   | AtTN10 rev  | GGGGACCACTTTGTACAAGAAAGCTGGGTCTATTGTTGCATAAATCGTCTTCTTGTGTTG   |
| 10  | AtTN11 rev  | GGGGACCACTTTGTACAAGAAAGCTGGGTCTACCAGATCTACCACTTAGACAACCTAACC   |
| 11  | AtTN21 rev  | GGGGACCACTTTGTACAAGAAAGCTGGGTCTCGCTATAACAATTCAGTGAAGAGACTTTG   |
| 12  | AtTN3 rev   | GGGGACCACTTTGTACAAGAAAGCTGGGTCTCTCCAATCCTTCTTCAACTTCTAAC       |

**Supplemental Table 3. Expression data from rice orthologs of Arabidopsis TIR-NBS genes.**

| Locus           | MC<br>24 | MR<br>06 | MR<br>12 | MR<br>24 | MS<br>06 | MS<br>12 | MS<br>24 | MS<br>96 | NCA<br>01 | NCL<br>01 | NCL<br>02 | NCR<br>01 | NDL<br>01 | NDL<br>02 | NDR<br>01 | NGS<br>01 |
|-----------------|----------|----------|----------|----------|----------|----------|----------|----------|-----------|-----------|-----------|-----------|-----------|-----------|-----------|-----------|
| LOC_Os01g 55530 | 27       | 18       | 18       | 13       | 29       | 3        | 16       | 9        | 84        | 23        | 17        | 53        | 30        | 23        | 69        | 37        |
| LOC_Os08g 38970 | 0        | 0        | 0        | 0        | 0        | 3        | 0        | 0        | 311       | 0         | 0         | 49        | 1         | 0         | 56        | 42        |
| LOC_Os09g 30380 | 1        | 0        | 1        | 0        | 0        | 3        | 2        | 0        | 3         | 0         | 0         | 0         | 1         | 2         | 6         | 7         |

  

| Locus           | NIP<br>01 | NLA<br>01 | NPO<br>01 | NSL<br>01 | NSL<br>02 | NSR<br>01 | NST<br>01 | NYL<br>01 | NYL<br>02 | NYR<br>01 | PLA<br>01 | PLA<br>02 | PLC<br>01 | PLC<br>02 | PLW<br>01 | PLW<br>02 |
|-----------------|-----------|-----------|-----------|-----------|-----------|-----------|-----------|-----------|-----------|-----------|-----------|-----------|-----------|-----------|-----------|-----------|
| LOC_Os01g 55530 | 67        | 21        | 7         | 19        | 11        | 79        | 115       | 69        | 34        | 81        | 0         | 0         | 0         | 0         | 12        | 13        |
| LOC_Os08g 38970 | 35        | 1         | 0         | 0         | 1         | 53        | 12        | 1         | 4         | 48        | 0         | 0         | 0         | 0         | 0         | 0         |
| LOC_Os09g 30380 | 11        | 1         | 0         | 0         | 2         | 4         | 9         | 0         | 0         | 6         | 0         | 0         | 0         | 0         | 0         | 0         |

  

| Locus           | PSC<br>01 | PSI<br>01 | PSI<br>02 | PSL<br>01 | PSL<br>02 | PSN<br>01 | PSN<br>02 | PSY<br>01 | PSY<br>02 | NSO<br>01 | NMR<br>01 |
|-----------------|-----------|-----------|-----------|-----------|-----------|-----------|-----------|-----------|-----------|-----------|-----------|
| LOC_Os01g 55530 | 0         | 0         | 0         | 0         | 0         | 38        | 57        | 0         | 12        | 54        | 104       |
| LOC_Os08g 38970 | 34        | 0         | 0         | 59        | 48        | 0         | 0         | 0         | 0         | 51        | 56        |
| LOC_Os09g 30380 | 0         | 0         | 0         | 0         | 0         | 0         | 0         | 0         | 0         | 21        | 7         |

MC : leaves from 3week old Pi9 transgenic plants; MR : leaves from 3week old Pi9 transgenic plants after rice blast inoculation (KJ201); MS : leaves from 3week old Nipponbare plants after rice blast inoculation (KJ201); NCA: Nipponbare 35 day callus; NCL : Two week old Nipponbare plant leaves stressed in cold for 24hrs; NCR : Two week old Nipponbare plant roots stressed in cold for 24hrs ; NDL : Two week old Nipponbare plant leaves stressed in drought for 24hrs; NDR : Two week old Nipponbare plant leaves stressed in drought for 24hrs; NGS : Nipponbare, 3day germinating seed; NIP : Nipponbare, 90 day immature panicle; NLA : Nipponbare, 60 day mature leaves; NPO : Nipponbare, mature pollen; NSL : 2 week Nipponbare plant leaves stressed in salt; NSR : 2 week Nipponbare plant roots stressed in salt; NST : 60 day Nipponbare stem; NYL : 2 week old Nipponbare plant leaves, untreated; NYR : 2 week old Nipponbare plant roots untreated; PLA : Beet armyworm damaged 2 week old Nipponbare plant leaves 24 hrs after infestation; PLC : Nipponbare control plant leaves after mechanical damage; PLW : Rice Water Weevil damaged 2 month old Nipponbare plant leaves 24 hrs after infestation; PSC : 6 day old seedlings developed from high milling quality cultivar Cypress; PSI : 6 day old seedlings developed from high taste quality cultivar ILpumbyeo; PSL : 6 day old seedlings developed from low milling quality cultivar LaGrue; PSN : 6 day old seedlings from Nipponbare control; PSY : 6 day old seedlings developed from low taste quality cultivar YRK; NSO :Nipponbare mature stigma and ovary; NMR : Nipponbare 60 day mature roots; The libraries are available at <http://mpss.udel.edu/rice>

**Supplemental Table 4. Phylogeny and conservation of TN protein domains among monocots and other basal angiosperms.**

| Gene   | type | gymnosperm |                 | basal angiosperms |              |           | monocots |                      |        | magnoliids |              |  |
|--------|------|------------|-----------------|-------------------|--------------|-----------|----------|----------------------|--------|------------|--------------|--|
|        |      | Zamia      | Amborella (454) | Aristolochia -454 | Nuphar (454) | Asparagus | Acorus   | Banana (M.acuminata) | Persea | Saruma     | Liriodendron |  |
| AtTN21 | TN   | -          | 62/75           | 47/67             | 63/84        | 77/84     | -        | 60/72                | 70/83  | 84/88      | 46/73        |  |
| AtTN17 | TN   | -          | 61/85           | 67/87             | 52/73        | 43/70     | -        | 57/71                | 39/60  | 42/70      | 59/79        |  |
| AtTN10 | TN   | -          | 45/64           | -                 | 48/65        | -         | -        | -                    | -      | -          | -            |  |
| AtTN11 | TN   | -          | 42/66           | -                 | 45/62        | -         | -        | -                    | -      | -          | 43/65        |  |
| AtTN3  | TN   | 41/58      | 51/68           | -                 | 33/52        | -         | -        | -                    | -      | -          | -            |  |
| RPM1   | CNL  | 35/55      | 41/67           | 32/52             | 41/65        | -         | -        | 31/50                | 45/64  | 39/68      | 38/67        |  |
| RPP1   | TNL  | 41/56      | 46/67           | 37/58             | 40/59        | 31/57     | 36/60    | 31/49                | 36/51  | 36/53      | 36/53        |  |

Each plant was grouped according to their families. The data represents a tblastx result of each of the TN protein from *Arabidopsis* blasted against the monocot genomes (*Asparagus* and *Acorus*) and other lower monocot genomes which includes magnoliids (*Persea*, *Samura* and *Liriodendron*) and basal angiosperms (*Amborella*, *Aristolochia* and *Nuphar*). Each of the cell values is presented as a ratio which represents a percent identity by percent positives. The tblastx is performed against the genomes that were sequenced and are available at (<http://jlmack.plantbio.uga.edu/blast/blast.html>). Banana genome data was obtained from (<http://banana-genome.cirad.fr/index.html>).

**Supplemental Table 5. Expression of *TN* and *TX* genes from public MPSS database libraries.**

| Locus     | Gene   | CAF | INF | LEF | ROF | SIF | AP1 | AP3 | AGM | INS | ROS | SAP | SA4 | SA52 | LES | GSE | CAS  | SIS |    |
|-----------|--------|-----|-----|-----|-----|-----|-----|-----|-----|-----|-----|-----|-----|------|-----|-----|------|-----|----|
| At1g17610 | AtTN1  |     |     |     |     |     |     |     |     |     |     |     | 4   | 103  | 4   |     |      |     |    |
| At1g47370 | AtTX1  |     |     | 9   |     | 19  |     | 3   |     | 4   |     |     |     |      |     |     |      | 3   |    |
| At1g65390 | AtTX10 |     |     | 5   |     |     |     | 6   | 3   |     |     |     |     |      | 2   |     |      |     |    |
| At1g66090 | AtTN3  | 21  |     | 8   |     | 7   |     |     |     |     |     |     |     | 1    |     |     | 14   |     |    |
| At1g72850 | AtTN4  | 7   | 2   | 21  | 13  | 7   | 1   | 11  |     |     | 25  |     |     | 7    | 4   |     |      |     |    |
| At1g72870 | AtTN5  |     |     |     | 5   | 3   |     |     |     | 1   | 6   |     |     |      |     |     | 3    | 8   |    |
| At1g72890 | AtTN6  | 141 | 6   | 13  | 21  | 3   | 2   | 4   | 2   |     | 17  |     | 14  | 13   | 20  | 2   | 191  |     |    |
| At1g72900 | AtTN7  | 200 |     | 10  |     | 6   | 3   |     | 40  | 7   |     | 16  |     | 805  | 199 |     | 1382 |     |    |
| At1g72910 | AtTN8  |     |     |     |     |     |     |     |     |     |     |     |     | 9    | 15  |     |      |     |    |
| At1g72920 | AtTN9  | 26  | 4   | 10  | 2   | 4   |     |     |     |     |     |     |     |      |     |     |      | 5   |    |
| At1g72930 | AtTN10 | 81  | 25  | 192 | 3   | 49  | 21  | 80  | 30  | 35  | 17  | 60  | 248 | 1499 | 369 | 1   | 318  | 70  |    |
| At1g72940 | AtTN11 | 177 | 5   | 6   | 9   |     | 6   | 32  | 13  | 13  | 3   | 60  | 6   | 117  | 93  | 10  | 215  | 0   |    |
| At1g72950 | AtTN12 | 30  | 6   |     | 18  |     |     | 5   |     |     |     |     |     |      |     |     | 8    | 2   | 28 |
| At2g03300 | AtTX12 |     |     |     |     |     |     |     |     |     |     |     |     |      |     |     |      |     |    |
| At2g20145 | AtTX13 | 79  |     | 2   | 2   |     |     |     |     |     | 5   |     |     | 12   | 4   |     | 73   |     |    |
| At2g32140 | AtTX14 |     |     |     |     |     |     |     |     |     |     |     |     |      | 4   |     |      |     |    |
| At3g04210 | AtTN13 | 70  | 58  | 285 |     |     | 13  | 48  | 10  | 24  |     | 26  | 316 | 2008 | 654 | 12  | 6    | 6   |    |
| At4g04110 | AtTN14 |     |     |     |     |     |     |     |     |     |     |     |     |      |     |     |      |     |    |
| At4g09420 | AtTN15 | 22  |     |     | 76  |     |     |     |     |     | 24  |     |     |      | 2   | 10  | 28   |     |    |
| At4g11340 | AtTX15 |     |     |     |     |     |     |     |     |     |     |     |     |      |     |     |      |     |    |
| At4g16990 | AtTN16 |     | 66  | 476 |     | 50  |     | 1   | 6   |     |     |     |     | 20   | 90  | 14  |      |     |    |
| At4g19920 | AtTX17 | 112 |     |     | 10  |     |     |     |     |     |     |     |     |      |     | 6   | 4    |     |    |
| At4g23440 | AtTN17 | 24  | 58  | 12  | 8   | 12  | 34  | 28  | 35  | 15  | 26  | 20  |     | 1    | 38  | 7   | 20   |     |    |
| At4g23513 | AtTX21 | 15  |     |     |     |     |     |     |     |     | 15  |     |     |      |     |     | 132  |     |    |
| At5g44920 | AtTX25 | 600 | 6   | 15  | 695 | 5   | 1   | 7   | 9   | 6   | 128 |     |     | 30   |     | 2   | 343  | 3   |    |
| At5g45000 | AtTX26 |     |     |     |     |     |     |     |     |     |     |     |     |      |     |     |      |     |    |
| At5g45070 | AtTX27 | 8   |     |     | 150 |     |     |     |     |     | 20  |     |     |      |     |     |      |     |    |
| At5g45080 | AtTX28 |     |     |     | 32  |     |     |     |     |     | 22  |     |     |      |     |     |      |     |    |
| At5g45090 | AtTX29 |     |     | 2   | 4   |     |     |     |     |     |     |     |     |      |     |     |      |     |    |
| At5g45220 | AtTX30 | 12  | 13  |     |     |     |     |     |     |     |     |     |     |      |     |     |      | 12  |    |
| At5g46480 | AtTN19 |     |     |     |     |     |     |     |     |     |     |     |     |      |     |     |      |     |    |
| At5g48780 | AtTN20 |     | 4   |     |     | 1   |     |     |     |     | 5   | 1   |     |      |     |     |      | 2   |    |
| At5g56220 | AtTN21 | 31  | 11  | 9   | 42  | 2   | 34  | 44  | 38  | 26  | 46  | 33  |     |      | 9   | 18  | 15   | 49  |    |

CAF/CAS=callus, INF/INS=inflorescence, LEF/LES=leaf, ROF/ROS=root, SIF/SIS=silique, SA4/52=salicylic acid, GSE=germinated seedlings, AP1/AP3/AGM=mutants.

\* values in different libraries are indicated in TPM (Transcripts Per Million).

**Supplemental Table 6. *Arabidopsis* TX and TN proteins used for HR assays on *N. benthamiana*.**

| #  | TX/TN protein | HR response (+/-) |
|----|---------------|-------------------|
| 1  | AtTN3         | +                 |
| 2  | AtTN10        | +                 |
| 3  | AtTN11        | +                 |
| 4  | AtTN21        | +                 |
| 5  | AtTX21        | +                 |
| 6  | AtTN1         | -                 |
| 7  | AtTN2         | -                 |
| 8  | AtTN6         | -                 |
| 9  | AtTN13        | -                 |
| 10 | AtTN15        | -                 |
| 11 | AtTN19        | -                 |
| 12 | AtTX6         | -                 |
| 13 | AtTX8         | -                 |
| 14 | AtTX10        | -                 |
| 15 | AtTX16        | -                 |

HR response is represented as plus (+) or minus (-) sign representing the presence or absence of HR.

**Supplemental Table 7. Stable transgenic overexpression lines generated in *Arabidopsis* ecotype Col-0.**

| <b>Gene</b> | <b>Annotation</b> | <b>Lines analyzed</b> |
|-------------|-------------------|-----------------------|
| At1g17610   | AtTN1             | 10 lines              |
| At1g17615   | AtTN2             | 20 lines              |
| At1g61105   | AtTX9             | 20 lines              |
| At1g57830   | AtTX6             | 10 lines              |
| At1g57850   | AtTX7             | 14 lines              |
| At1g60320   | AtTX8             | 11 lines              |
| At1g65390   | AtTX10            | 15 lines              |
| At1g72850   | AtTN4             | 12 lines              |
| At1g72930   | AtTN10            | 8 lines               |
| At1g72940   | AtTN11            | 10 lines              |
| At2g32140   | AtTX14            | 13 lines              |
| At4g11345   | AtTX16            | 13 lines              |
| At4g09420   | AtTN15            | 10 lines              |
| At3g04210   | AtTN13            | 10 lines              |
| At4g23440   | AtTN17            | 8 lines               |
| At4g23513   | AtTX21            | 15 lines              |
| At5g56220   | AtTN21            | 15 lines              |
| At5g46480   | AtTN19            | 12 lines              |
| At5g44910   | AtTX24            | 17 lines              |
| At5g45000   | AtTX26            | 14 lines              |
| At5g40090   | AtTN18            | 10 lines              |
| *At1g66090  | AtTN3             | 10 lines              |
| pK2GW7      | control           | 8 lines               |

Number of lines analyzed were tabulated in the third column.

\* We could not develop transgenics for At1g66090 after repeating for three times in Col-0 background. We were however able to generate transgenics in *eds-1* background in *Arabidopsis*.

**Supplemental Table 8. Salk T-DNA knockout lines for *TX* and *TN* genes.**

| #  | Gene      | Annotation | Salk accession number    |
|----|-----------|------------|--------------------------|
| 1  | At1g60320 | AtTX8      | salk_013760              |
| 2  | At1g65390 | AtTX10     | salk_132166              |
| 3  | At1g72860 | TNL        | salk_058326              |
| 4  | At1g72890 | AtTN6      | salk_099669              |
| 5  | At1g72900 | AtTN7      | salk_051714              |
| 6  | At1g72920 | AtTN9      | salk_023426              |
| 7  | At1g72940 | AtTN11     | salk_070394              |
| 8  | At3g04210 | AtTN13     | salk_056759              |
| 9  | At4g11340 | AtTX15     | salk_053459              |
| 10 | At4g23440 | AtTN17     | cs839709                 |
| 11 | At5g44900 | AtTX23     | salk_014983              |
| 12 | At5g45070 | AtTX27     | salk_020832              |
| 13 | At5g45220 | AtTX30     | salk_055052              |
| 14 | At5g56220 | AtTN21     | salk_114218, salk_114410 |

Salk accession number corresponds to the lines that were tested for the respective *TX* or *TN* gene.

## Supplemental Table 9. Summary of TX and TN phenotypes.

### A. Transcriptional data and overexpression phenotypes

| TX/TN gene | Annotation | Signature abundance (in TPM) <sup>a</sup> | Gene Expression libraries # | Leaf control | SA   | SA Foliar spray | MeJA exogenous Application | Overexpression Phenotypes                                               |
|------------|------------|-------------------------------------------|-----------------------------|--------------|------|-----------------|----------------------------|-------------------------------------------------------------------------|
| At1g17615  | AtTN2      | 4-103                                     | 3                           | 4            | 103  | NA              | NA                         | Stunted, curly leaves                                                   |
| At1g66090  | AtTN3      | 1-21                                      | 5                           | 0            | 1    | Yes             | yes                        | HR response in <i>N. benthamiana</i>                                    |
| At1g72930  | AtTN10     | 1-1499                                    | 17                          | 369          | 1499 | No              | yes                        | Resistance to <i>P.syringae</i> DC3000 & <i>F.oxysorum</i> strain O-685 |
| At1g72940  | AtTN11     | 3-215                                     | 15                          | 93           | 117  | Yes             | yes                        | NA                                                                      |
| At4g23513  | AtTX21     | 15-132                                    | 3                           | 0            | 0    | NA              | NA                         | Resistance to <i>P.syringae</i> DC3000 & <i>F.oxysorum</i> strain O-685 |
| At5g56220  | AtTN21     | 9-49                                      | 14                          | 9            | 0    | No              | No                         | Resistance to <i>P.syringae</i> DC3000                                  |

### B. Protein analysis results and related phenotypic data.

| TX/TN gene | Annotation | Free SA levels in transgenics compared to control | Ability to induce stomules | Conservation with other plant genomes | Localization           | Protein interactions                                                                                                                                                                                                                                                                                                                                                                                                    |
|------------|------------|---------------------------------------------------|----------------------------|---------------------------------------|------------------------|-------------------------------------------------------------------------------------------------------------------------------------------------------------------------------------------------------------------------------------------------------------------------------------------------------------------------------------------------------------------------------------------------------------------------|
| At1g17615  | AtTN2      | Higher by 4 fold                                  | NA                         | With other TNLs                       | Cytoplasm              | Pto66 (AvrPto) of <i>P. syringae</i> and Ral011t ( <i>R. solanacearum</i> ), Mor003                                                                                                                                                                                                                                                                                                                                     |
| At1g66090  | AtTN3      | NA                                                | NA                         | With other TNLs                       | Nuc+Cyto               | Pto42 (HopY), Brl028 ( <i>B. Lactucae</i> ), At3g14470 (NB-LRR)                                                                                                                                                                                                                                                                                                                                                         |
| At1g72930  | AtTN10     | Higher by 7 fold                                  | Yes in NRIP1               | With other TNLs                       | Nuc+Cyto               | Rbp001 (root knot nematode effector), Urf004                                                                                                                                                                                                                                                                                                                                                                            |
| At1g72940  | AtTN11     | Higher by 2 fold                                  | NA                         | With other TNLs                       | membrane               | Hpp001 ( <i>Hyaloperonospora parasitica</i> )                                                                                                                                                                                                                                                                                                                                                                           |
| At4g23513  | AtTX21     | Higher by 2 fold                                  | NA                         | With Musa                             | Cytoplasmic aggregates | Pto66 (AvrPto) of <i>P. syringae</i>                                                                                                                                                                                                                                                                                                                                                                                    |
| At5g56220  | AtTN21     | Higher by 7 fold                                  | NA                         | Highly conserved                      | membrane               | <i>P. syringae</i> - Psy(2), Pto(5), Pph (3)<br><i>R. solanacearum</i> - Ral (6)<br><i>P. fluorescens</i> - Pfl003, <i>B. lactucae</i> - Brl(6), <i>H. parasitica</i> - Hpp001, Hpp021<br>nematode - Rbp001, Rbp002, <i>M. oryza</i> - Mor003; Pvx001<br>plant proteins: At5g63020 (NB-LRR), At1g12210, At4g16950, At4g36150, At5g63020, AtACT, AtEDS1, AtPBS1, AtTGA1, AtTGA2, AtTGA3, AtTGA7, AtMPK4, LeCMPG1, AtTN21 |
